# Supplementary material for: The RNA-binding protein ROD1/PTBP3 cotranscriptionally defines AID-loading sites to mediate antibody class switch in mammalian genomes
Source: PubMed Central journal article supplement (PMC6170407; doi:10.1038/s41422-018-0076-9), 2018-08-24
Supplement: 41422_2018_76_MOESM2_ESM.pdf [file 41422_2018_76_MOESM2_ESM.pdf]

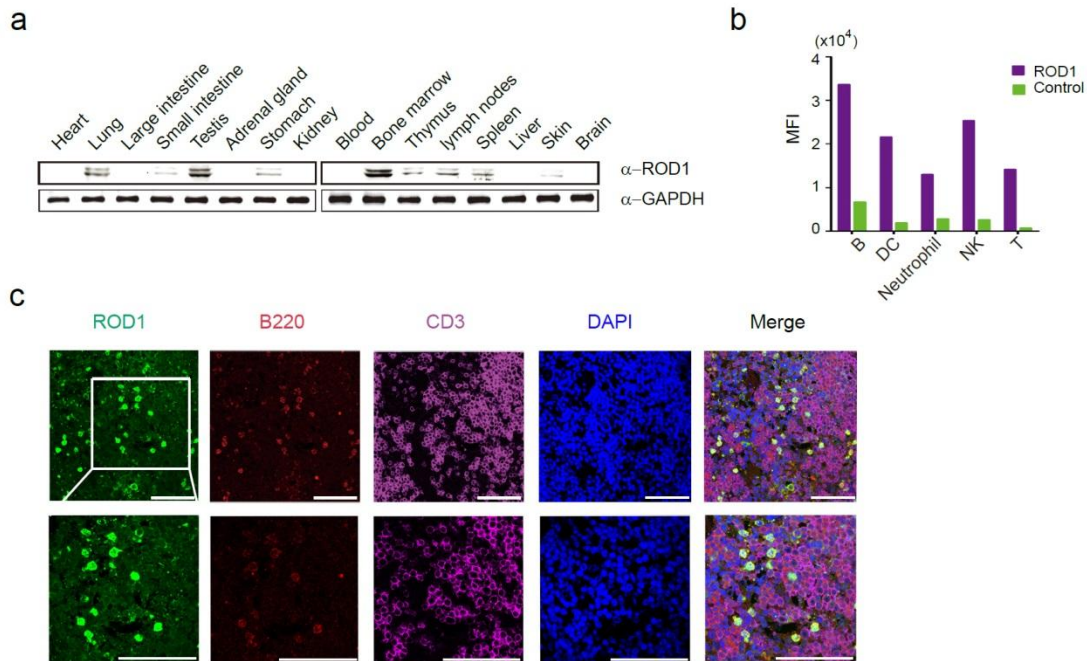

**Supplementary Figure 2.** ROD1 is highly expressed in B cells. **(a)** ROD1 expression in lysates extracted from diverse mouse tissues. GAPDH served as a loading control. **(b)** Flow cytometric analysis of ROD1 expression in isolated lymphoid cells, dendritic cells and neutrophils from spleen. MFI: mean fluorescence intensity. **(c)** Immunofluorescence staining of ROD1, B220 and CD3 in splenic sections. ROD1 is in green, B220 in red, CD3 in purple and DAPI in blue. Scale bar: 50  $\mu$ m.
