# Supplementary material for: The RNA-binding protein ROD1/PTBP3 cotranscriptionally defines AID-loading sites to mediate antibody class switch in mammalian genomes
Source: PubMed Central journal article supplement (PMC6170407; doi:10.1038/s41422-018-0076-9), 2018-08-24
Supplement: 41422_2018_76_MOESM3_ESM.pdf [file 41422_2018_76_MOESM3_ESM.pdf]

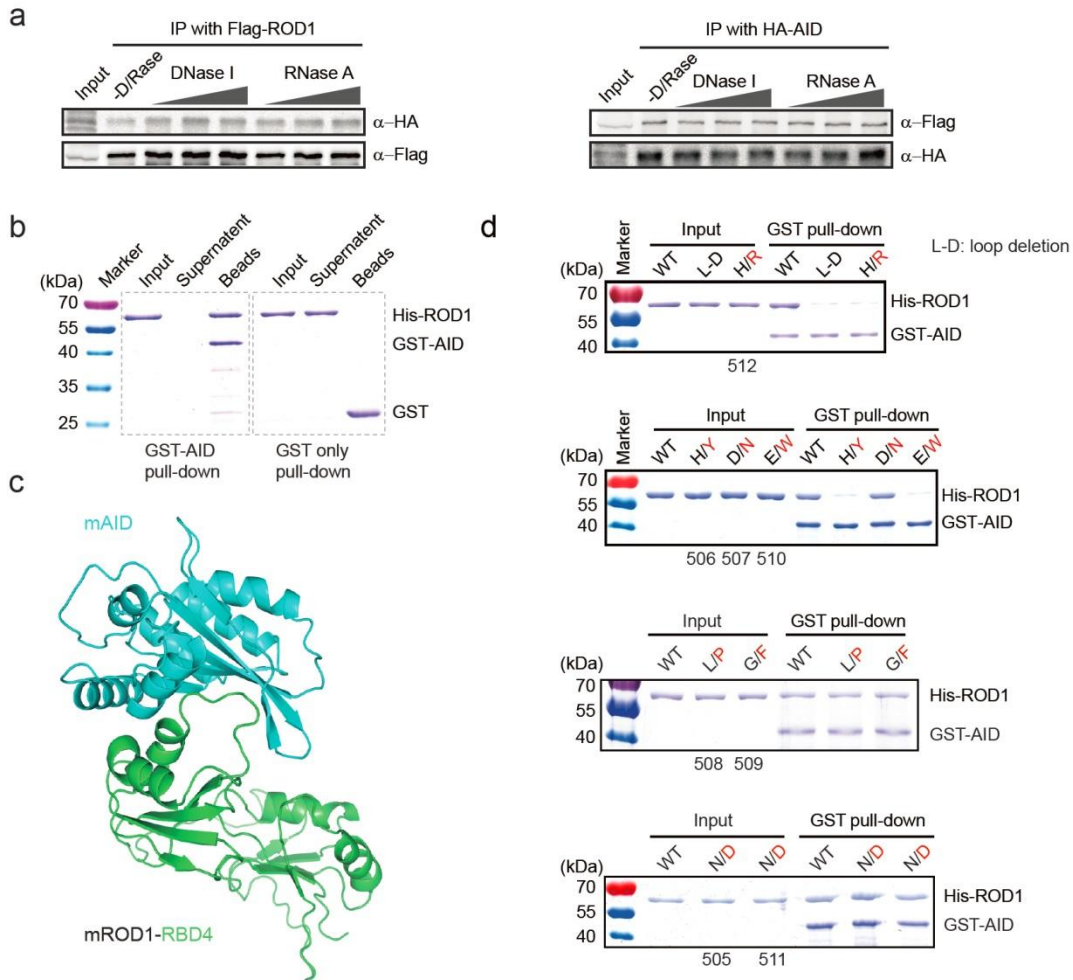

**Supplementary Figure 3.** Key residues contribute to direct interactions between ROD1 and AID. **(a)** ROD1 interacts with AID in a co-IP assay. HEK293 cells were co-transfected with Flag-tagged ROD1 and HA-tagged AID. The co-IP was performed with anti-Flag and anti-HA antibodies, the immunoprecipitates were analyzed by Western blot with antibody to HA or Flag. Three different concentrations of DNase I (0.1 U/ $\mu$ l, 0.01 U/ $\mu$ l and 0.001 U/ $\mu$ l) and RNase A (1  $\mu$ g/ $\mu$ l, 0.1  $\mu$ g/ $\mu$ l and 0.01  $\mu$ g/ $\mu$ l) were used. **(b)** The direct interaction between ROD1 and AID by GST pull-down assay. **(c)** The 3D interacting complex of AID and ROD1 modeled by PRISM. mAID is shown in cyan, whereas the ROD1 RBD4 domain is in green. **(d)** GST-AID pulled-down proteins from the inputs of bacterially expressed His-ROD1-mutated variants.
