# Supplementary material for: The RNA-binding protein ROD1/PTBP3 cotranscriptionally defines AID-loading sites to mediate antibody class switch in mammalian genomes
Source: PubMed Central journal article supplement (PMC6170407; doi:10.1038/s41422-018-0076-9), 2018-08-24
Supplement: 41422_2018_76_MOESM4_ESM.pdf [file 41422_2018_76_MOESM4_ESM.pdf]

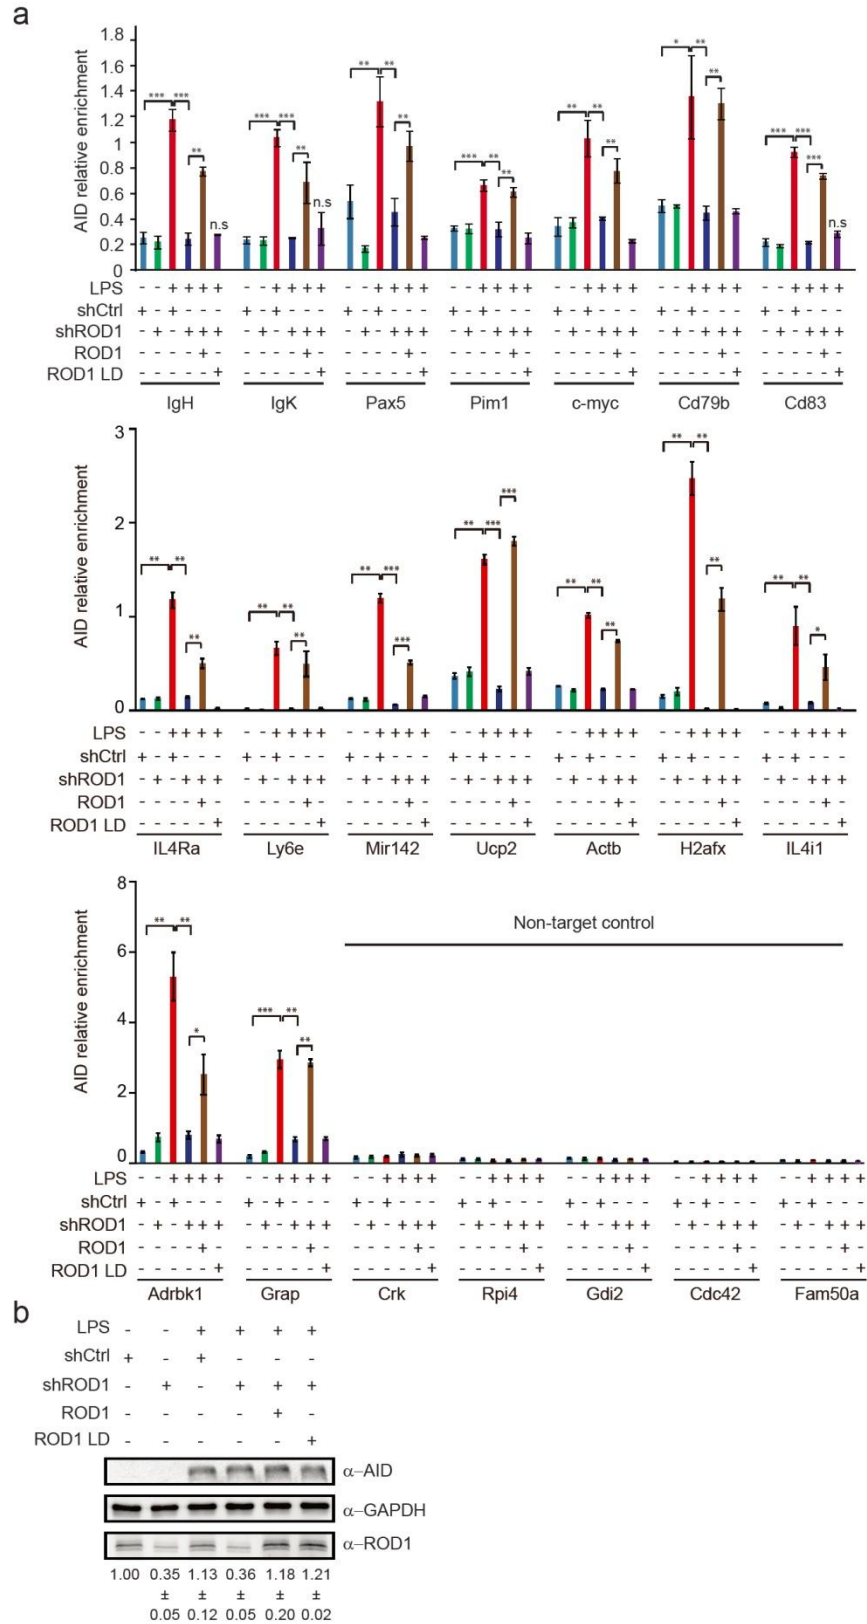

**Supplementary Figure 4.** The loop region is required for AID targeting. **(a)** ChIP-qPCR for AID occupancy in *Ig* and non-*Ig* targets of primary B cells infected with shROD1,

shCtrl, ROD1 and a ROD1 loop deletion mutant (LD). ChIP was performed with either anti-AID or control IgG. Five AID non-targets served as negative controls. \* $P < 0.05$ , \*\* $P < 0.01$ , \*\*\* $P < 0.001$  and  $P > 0.05$  was non-significant (n.s.) by two-tailed Student's  $t$ -test. Data are shown as the mean  $\pm$  SD ( $n = 3$ ) and normalized against input DNA. **(b)** Western blotting of ROD1 and AID expression in differently treated B cells. A shRNA-resistant mutant with same protein coding potential was applied for the rescue experiment. GAPDH served as a loading control. ROD1 expression levels were quantified and shown at the bottom. Data are shown as the mean  $\pm$  SD ( $n = 3$ ).
