# Supplementary material for: The RNA-binding protein ROD1/PTBP3 cotranscriptionally defines AID-loading sites to mediate antibody class switch in mammalian genomes
Source: PubMed Central journal article supplement (PMC6170407; doi:10.1038/s41422-018-0076-9), 2018-08-24
Supplement: 41422_2018_76_MOESM5_ESM.pdf [file 41422_2018_76_MOESM5_ESM.pdf]

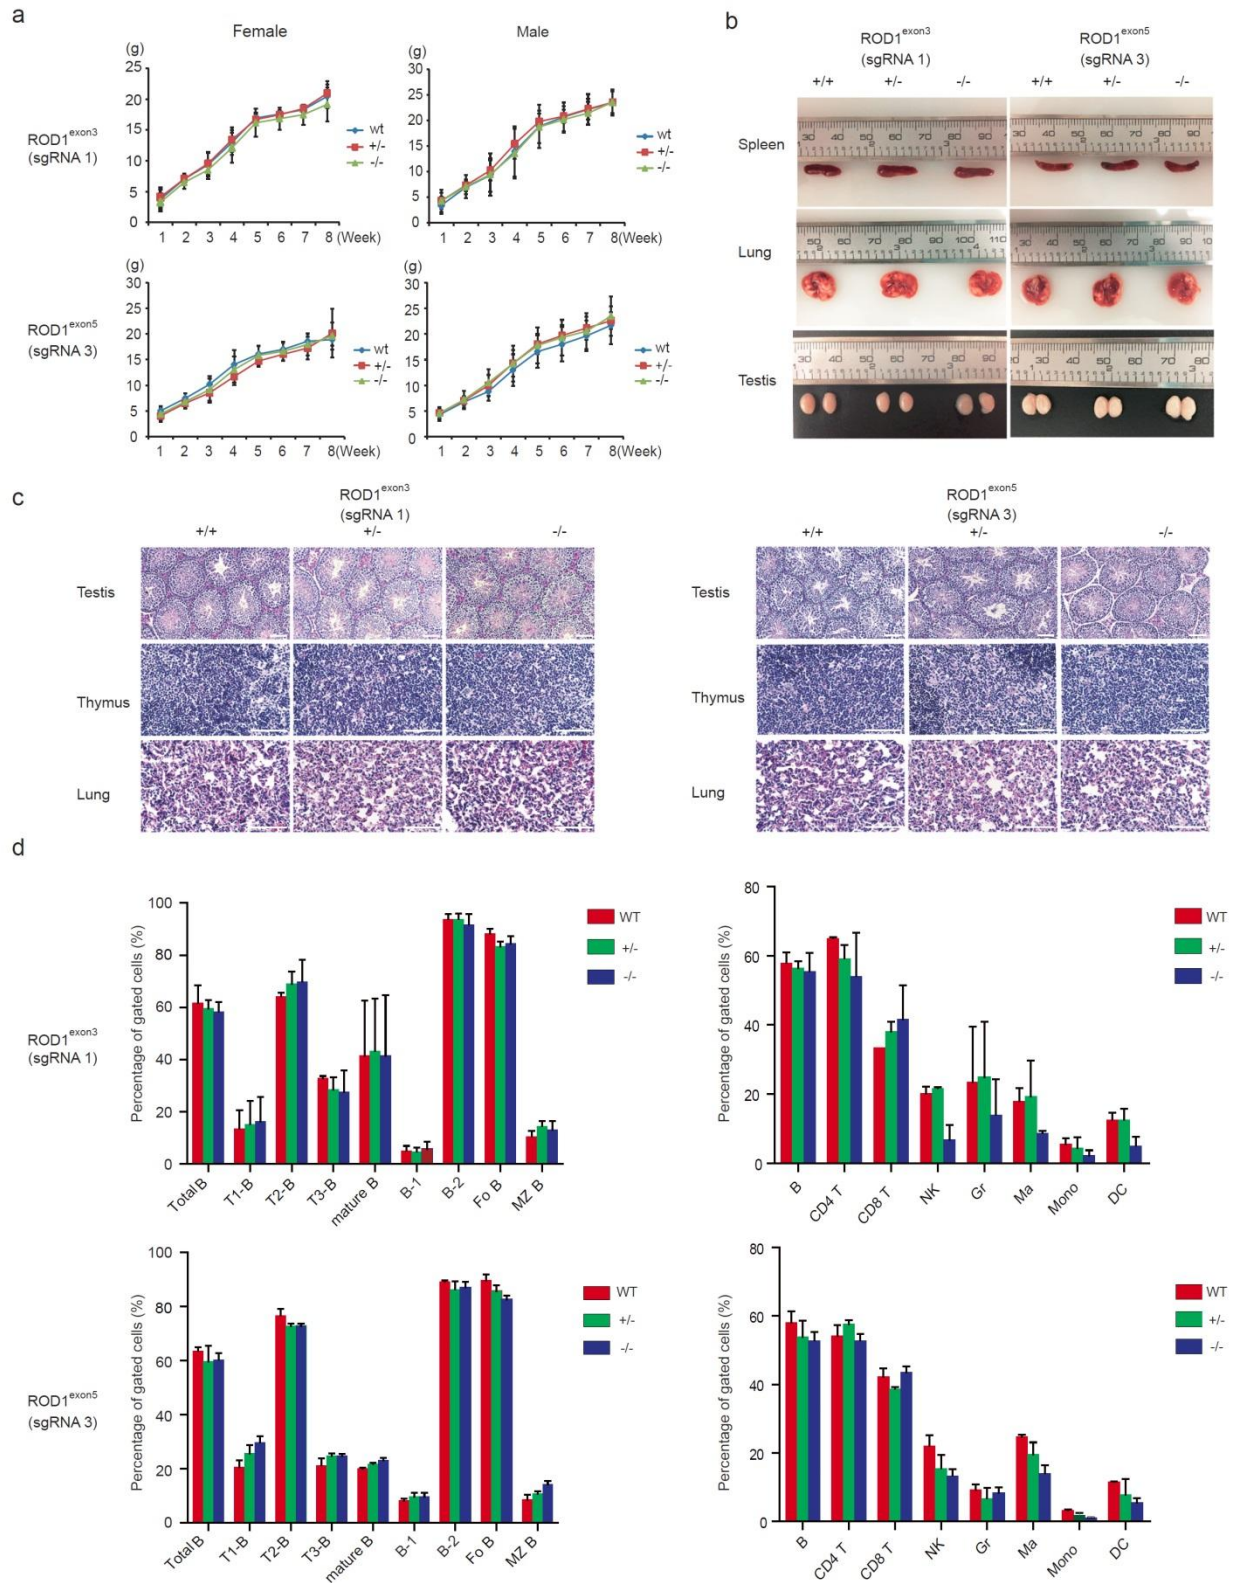

**Supplementary Figure 5.** ROD1 knockout mice are normal and fertile. **(a)** The body weights recorded for different ROD1 genotypes and sexes at different time points. ROD1 knockout mice were generated with either sgRNA 1 targeting exon 3 or sgRNA 3

targeting exon 5. For each genotype and sex, 10 age-matched mice were measured from week 1 to week 8. **(b)** Representative morphology of the spleen, lung and testis from 8-week-old *RODI*<sup>+/+</sup>, *RODI*<sup>+/-</sup> and *RODI*<sup>-/-</sup> mice. N = 3 for each genotype. **(c)** Hematoxylin and eosin staining of testis, thymus and lung sections from 8-week-old mice (n = 3). Scale bar: 50  $\mu$ m. **(d)** Flow cytometric analysis of splenic lymphocyte numbers in different genotypes (n = 3). Fo B: Follicular B; MZ B: Marginal zone B; NK: Natural killer; Gr: Granular; Ma: Macrophage; Mono: Monocyte; DC: Dendritic cell; Pro B: Progenitor B; Pre B: Precursor B.
