# Supplementary material for: The RNA-binding protein ROD1/PTBP3 cotranscriptionally defines AID-loading sites to mediate antibody class switch in mammalian genomes
Source: PubMed Central journal article supplement (PMC6170407; doi:10.1038/s41422-018-0076-9), 2018-08-24
Supplement: 41422_2018_76_MOESM7_ESM.pdf [file 41422_2018_76_MOESM7_ESM.pdf]

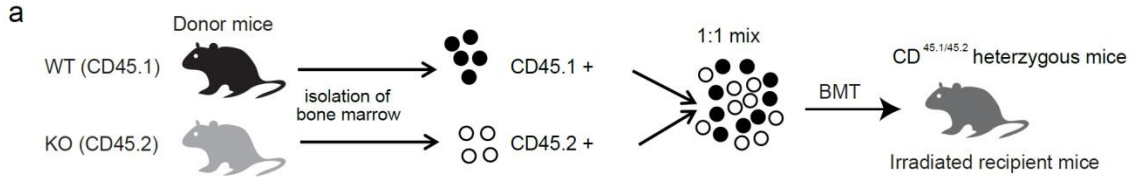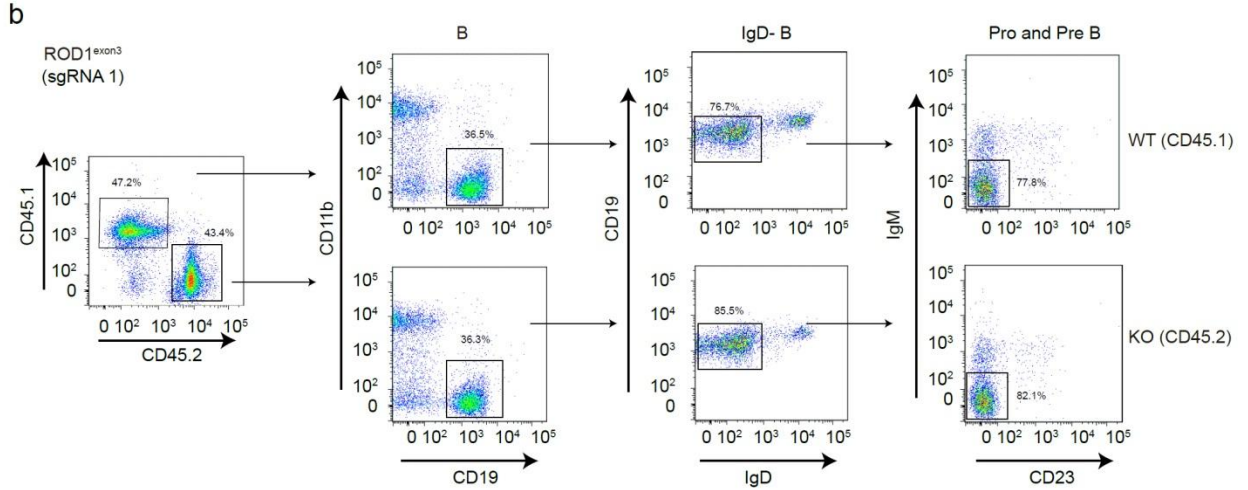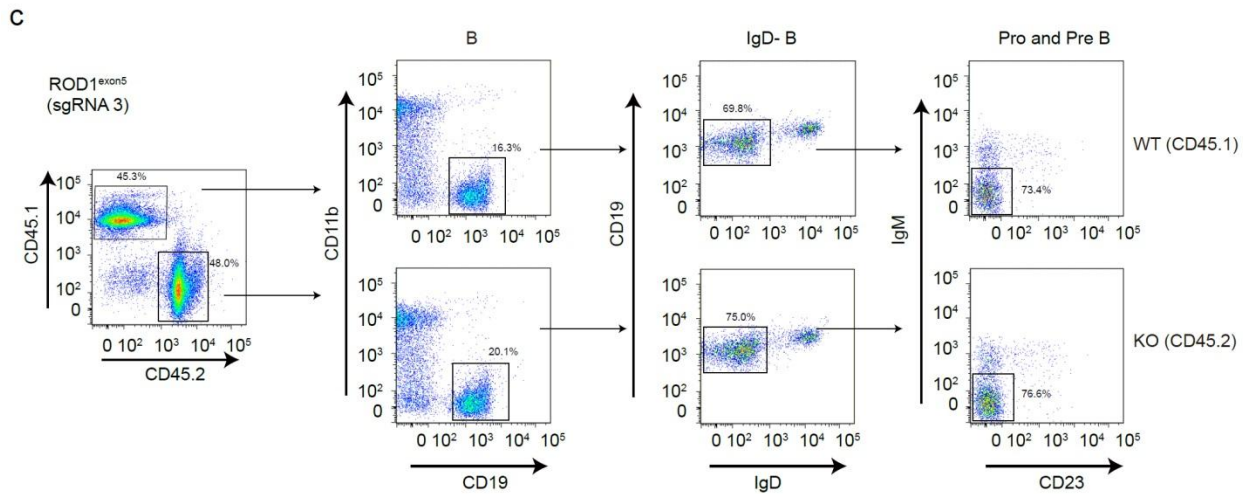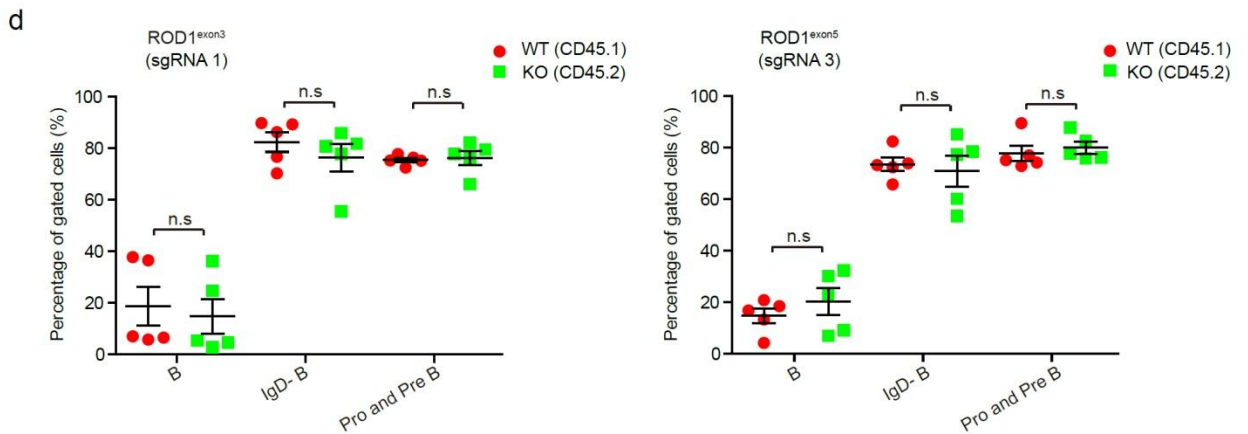

**Supplementary Figure 7.** ROD1 depletion has no influence on B cell differentiation in the bone marrow of CD45.1 and CD45.2 mixed chimeras. **(a)** Generation of chimeric mice by transplantation of mixed bone marrow cells from *ROD1*<sup>-/-</sup> (CD45.2) and WT (CD45.1) donor mice into irradiated CD45.1<sup>+</sup>/45.2<sup>+</sup> recipients. **(b, c)** Flow cytometric analysis of repopulating bone marrow cells in WT and *ROD1*<sup>-/-</sup> chimeric mice after 6 weeks of reconstitution (n = 5). Numbers on plots indicate percentages of plotted cells in the gate (axes are in arbitrary units of fluorescence intensity). The cell gating strategy is shown by the thin arrowhead. Pro B: Progenitor B; Pre B: Precursor B. **(d)** Quantification of B cell subsets in the bone marrows from WT and *ROD1*<sup>-/-</sup> chimeric mice as shown in (b, c). Data are shown as the mean ±SD (n = 5). The n.s represents non-significant, two-tailed Student's *t*-test.
