# Supplementary material for: The RNA-binding protein ROD1/PTBP3 cotranscriptionally defines AID-loading sites to mediate antibody class switch in mammalian genomes
Source: PubMed Central journal article supplement (PMC6170407; doi:10.1038/s41422-018-0076-9), 2018-08-24
Supplement: 41422_2018_76_MOESM8_ESM.pdf [file 41422_2018_76_MOESM8_ESM.pdf]

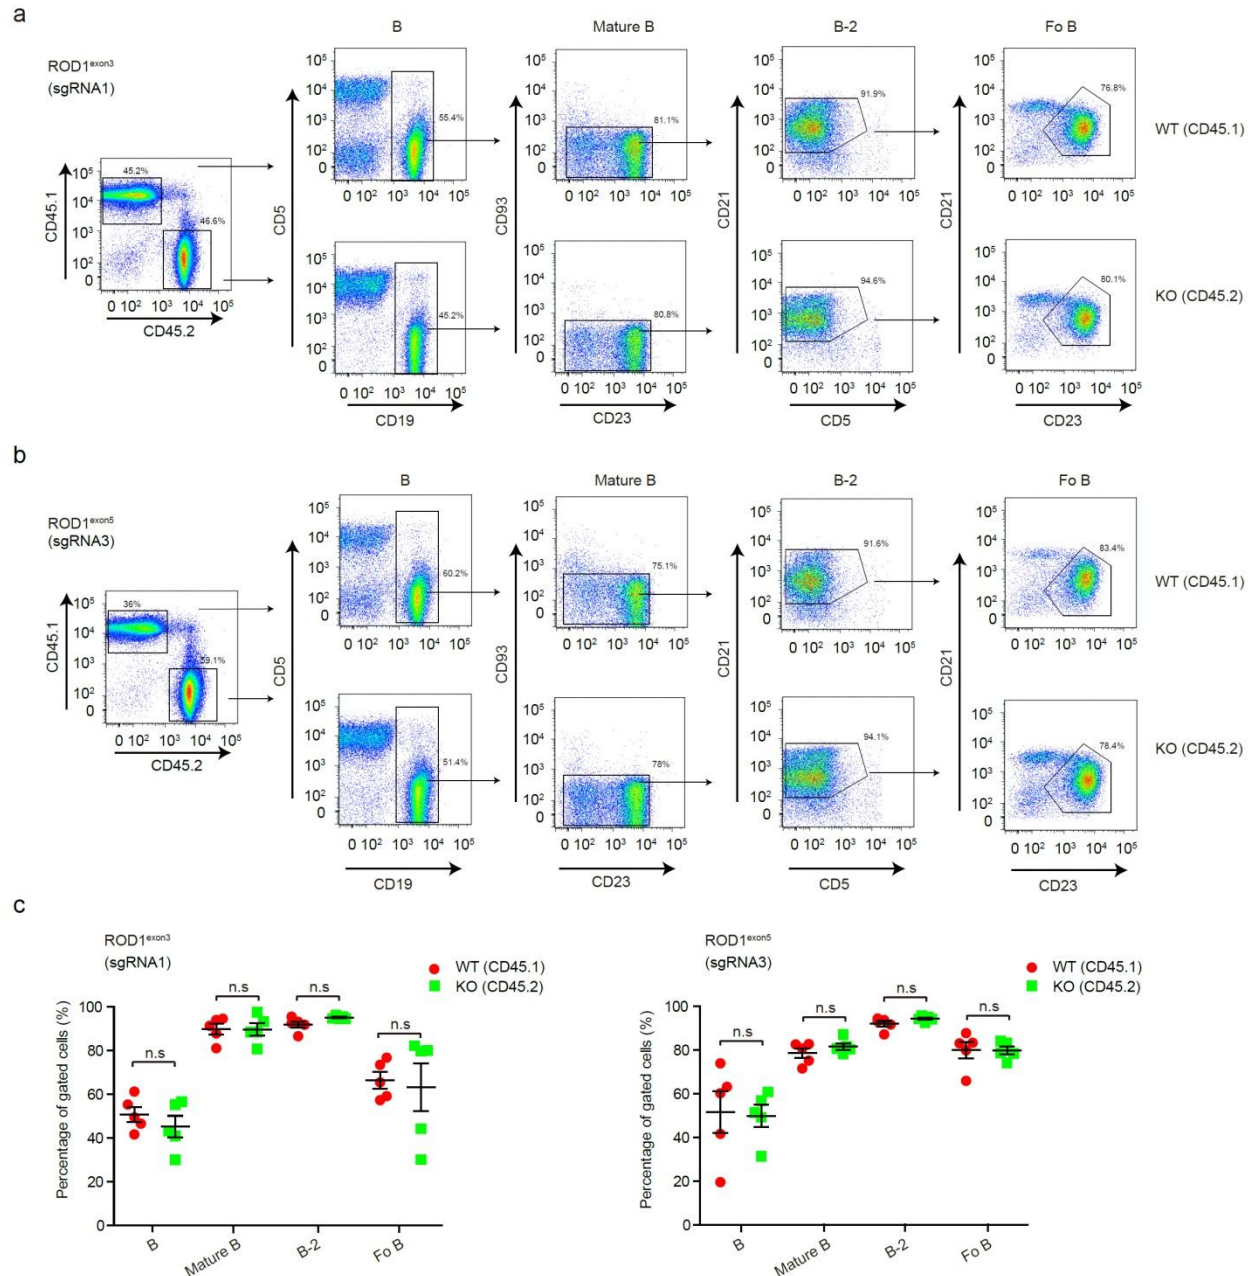

**Supplementary Figure 8.** ROD1 ablation has no influence on B cell differentiation in the spleen of CD45.1 and CD45.2 mixed chimeras mice. **(a, b)** Flow cytometric analysis of the repopulating splenic B cells in WT and *ROD1*<sup>-/-</sup> chimeric mice after 6 weeks of reconstitution (n = 5). Fo B: Follicular B. **(c)** Quantification of B cell subsets in the spleens of WT and *ROD1*<sup>-/-</sup> chimeric mice as shown in (a, b). Data are shown as the mean  $\pm$  SD (n = 5). The n.s represents non-significant, two-tailed Student's *t*-test.
