# Supplementary material for: The RNA-binding protein ROD1/PTBP3 cotranscriptionally defines AID-loading sites to mediate antibody class switch in mammalian genomes
Source: PubMed Central journal article supplement (PMC6170407; doi:10.1038/s41422-018-0076-9), 2018-08-24
Supplement: 41422_2018_76_MOESM9_ESM.pdf [file 41422_2018_76_MOESM9_ESM.pdf]

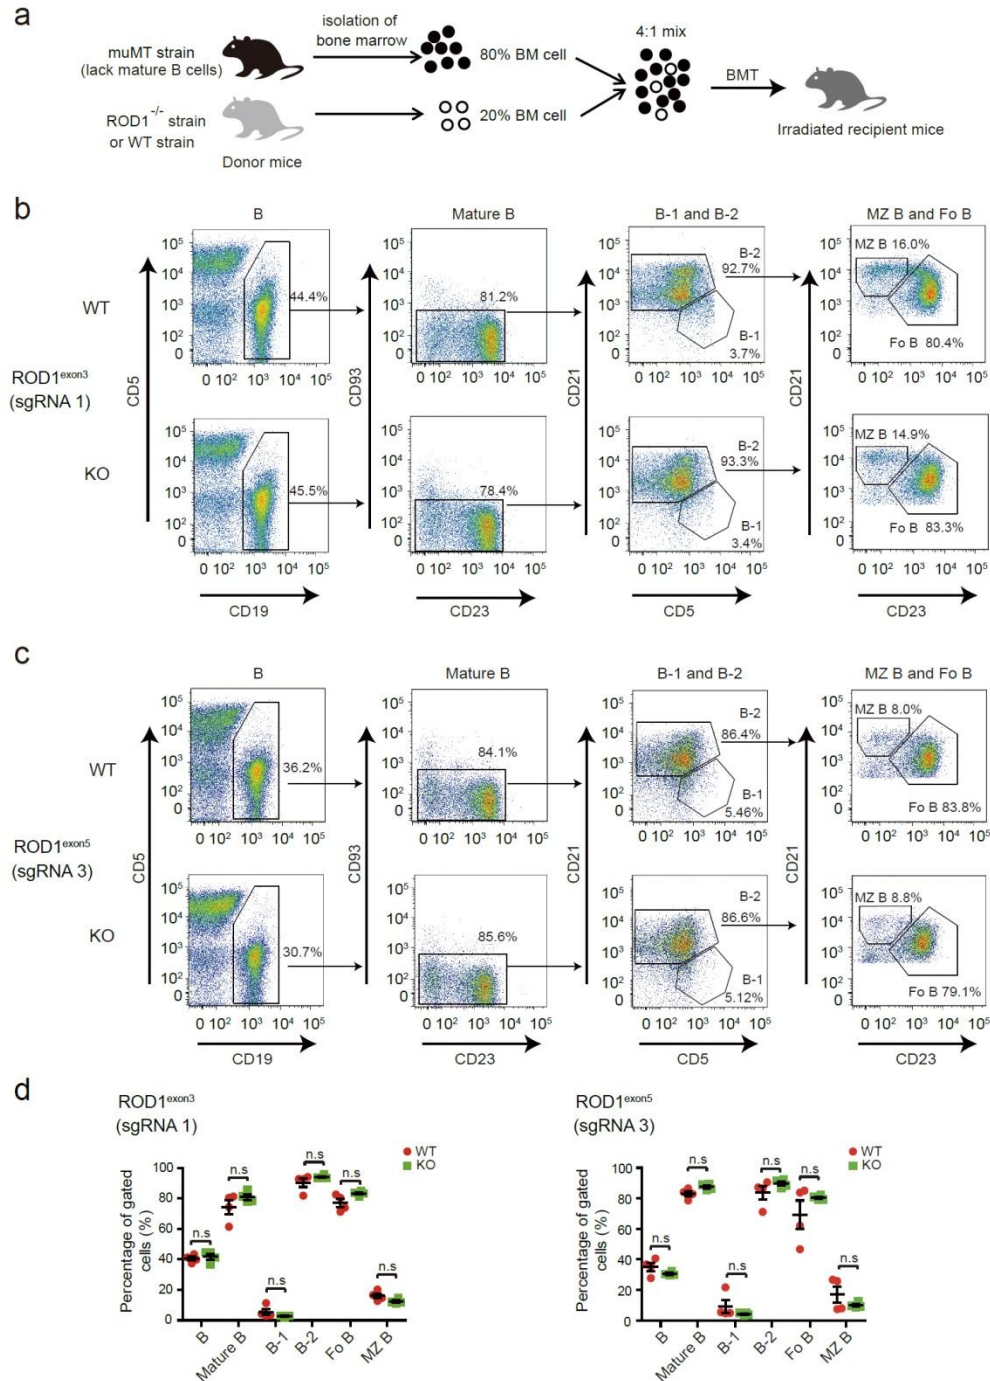

**Supplementary Figure 9.** The quantification of repopulating splenic B cells in muMT and WT or *RODI*<sup>-/-</sup> chimeric mice. **(a)** Generation of bone marrow chimeric mice where donors and/or recipients were either muMT, *RODI*<sup>-/-</sup> or WT mice. **(b, c)** Flow cytometric analysis of repopulating splenic B cells in muMT and WT or *RODI*<sup>-/-</sup> chimeric mice (n = 4). Numbers on plots indicate percentages of plotted cells in the gate. The cell gating strategy is shown by the thin arrowhead. Fo B: Follicular B; MZ B: Marginal zone B. **(d)**

Quantification of B cell subsets in spleens of muMT and WT or *RODI*<sup>-/-</sup> chimeric mice as shown in (b, c). The data are presented as the mean  $\pm$  SD.
