# Supplementary material for: The RNA-binding protein ROD1/PTBP3 cotranscriptionally defines AID-loading sites to mediate antibody class switch in mammalian genomes
Source: PubMed Central journal article supplement (PMC6170407; doi:10.1038/s41422-018-0076-9), 2018-08-24
Supplement: 41422_2018_76_MOESM10_ESM.pdf [file 41422_2018_76_MOESM10_ESM.pdf]

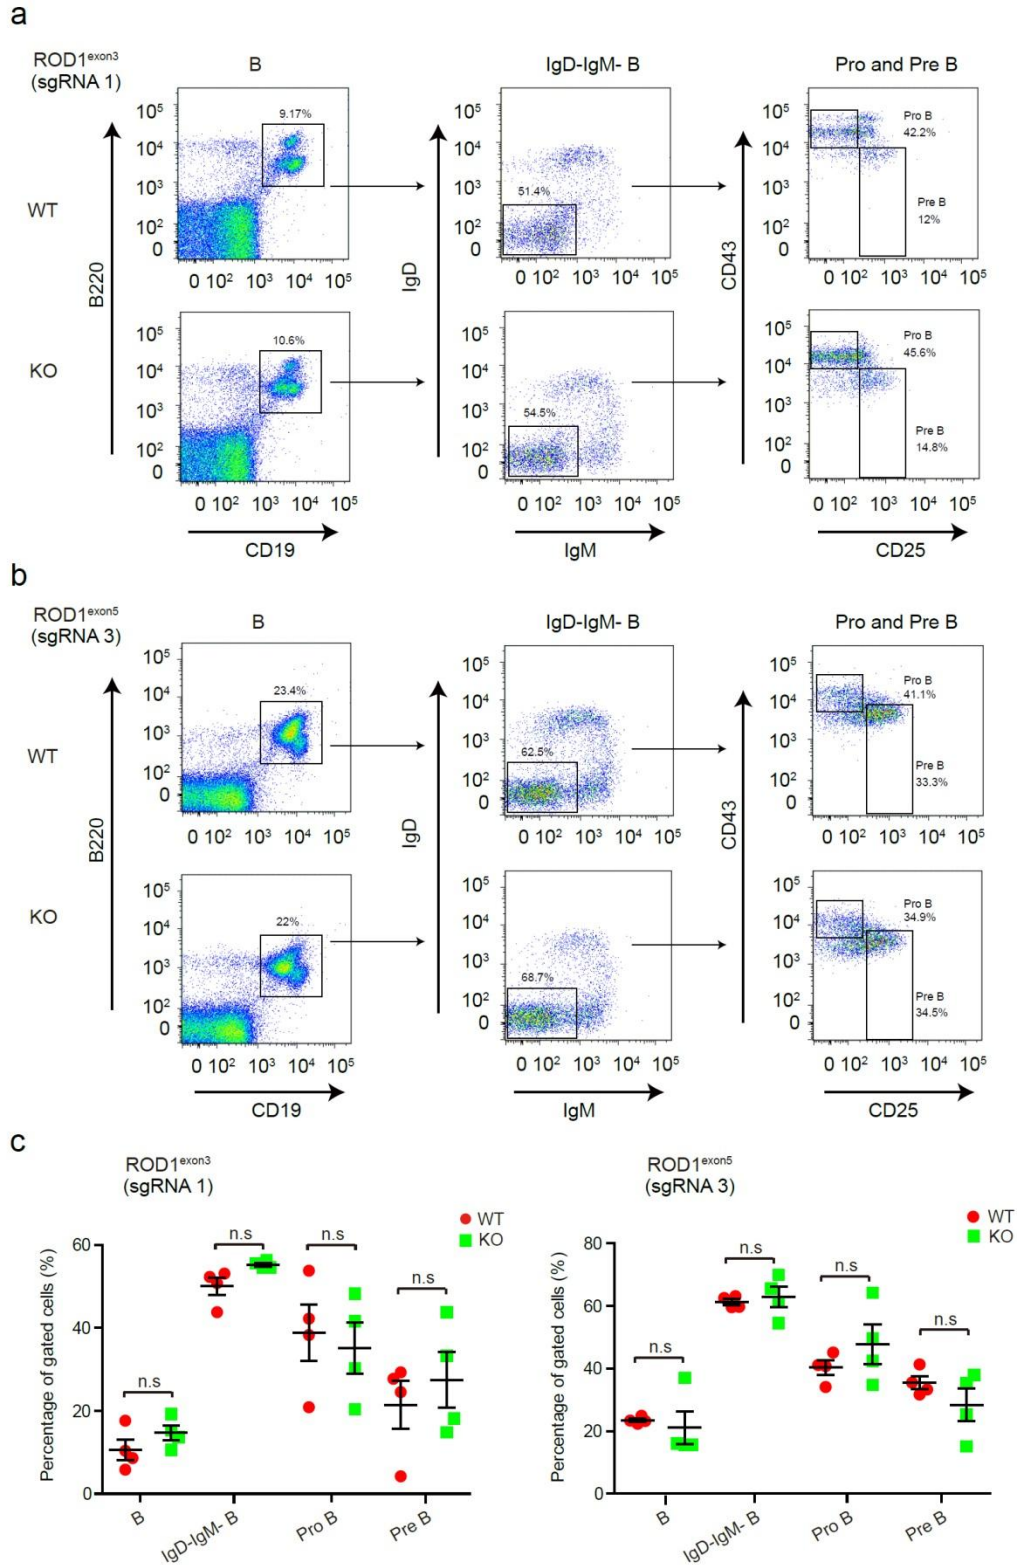

**Supplementary Figure 10.** ROD1 ablation has no influence on B cell differentiation in the bone marrow of muMT chimeric mice. **(a, b)** Flow cytometric analysis of repopulating bone marrow B cells in muMT and WT or *ROD1*<sup>-/-</sup> chimeric mice after 6

weeks of transplantation (n = 4). Pro B: Progenitor B; Pre B: Precursor B. (c)  
Quantification of B cell subsets in the bone marrows of muMT and WT or *RODI*<sup>-/-</sup>  
chimeric mice (n = 4).
