# Supplementary material for: The RNA-binding protein ROD1/PTBP3 cotranscriptionally defines AID-loading sites to mediate antibody class switch in mammalian genomes
Source: PubMed Central journal article supplement (PMC6170407; doi:10.1038/s41422-018-0076-9), 2018-08-24
Supplement: 41422_2018_76_MOESM11_ESM.pdf [file 41422_2018_76_MOESM11_ESM.pdf]

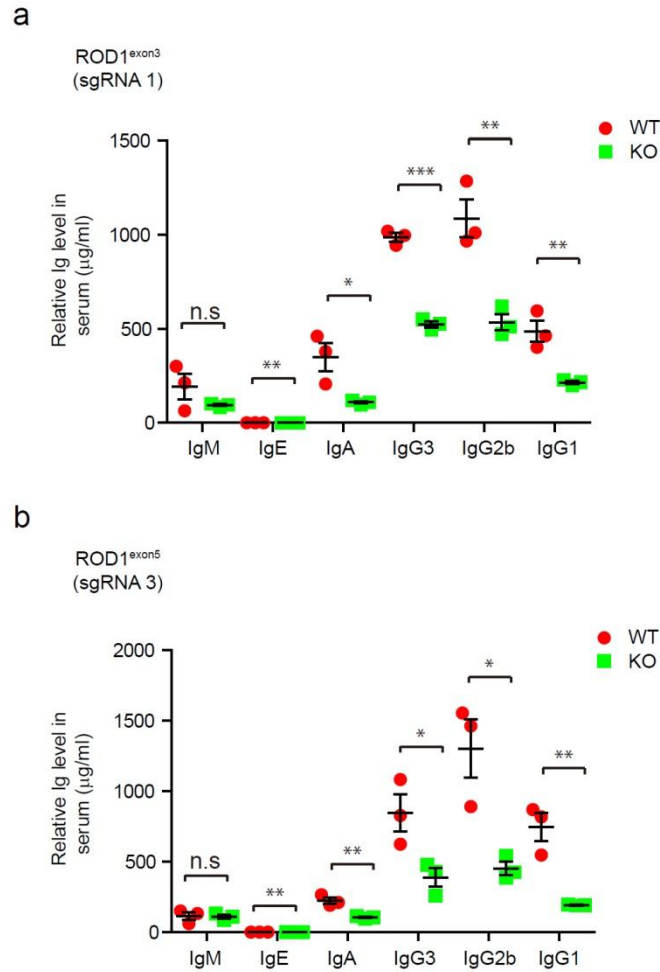

**Supplementary Figure 11.** ROD1 ablation causes reduced antibody titers in the muMT and *ROD1*<sup>-/-</sup> chimeric mice. **(a, b)** The Ig concentration was quantified by ELISA with blood from muMT and WT or *ROD1*<sup>-/-</sup> chimeric mice, respectively. Blood samples were harvested after 6 weeks of mixed bone marrow reconstitution (n = 3 for each genotype). \* $P < 0.05$ , \*\* $P < 0.01$ , \*\*\* $P < 0.001$  and  $P > 0.05$  was non-significant (n.s) as determined by two-tailed Student's *t*-test.
