# Supplementary material for: The RNA-binding protein ROD1/PTBP3 cotranscriptionally defines AID-loading sites to mediate antibody class switch in mammalian genomes
Source: PubMed Central journal article supplement (PMC6170407; doi:10.1038/s41422-018-0076-9), 2018-08-24
Supplement: 41422_2018_76_MOESM12_ESM.pdf [file 41422_2018_76_MOESM12_ESM.pdf]

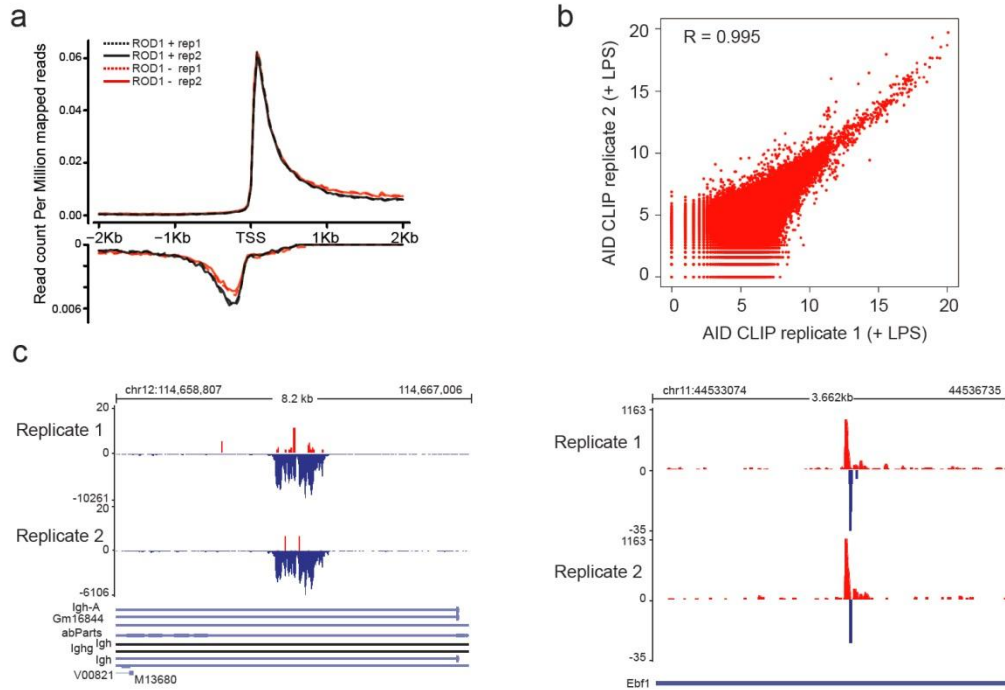

**Supplementary Figure 12.** Nascent RNA shows little change upon ROD1 depletion by Gro-seq. **(a)** The alignment of Gro-seq reads to TSSs in both the sense (upper) and antisense (lower) directions. The Gro-seq replicates in the presence of ROD1 are shown as black solid or dash lines. The Gro-seq replicates in the absence of ROD1 are shown as orange solid or dash lines. **(b)** The reproducibility of AID CLIP-seq analyzed by Pearson's correlation. Scatter plots show log<sub>2</sub>-normalized read numbers between two replicates. R represents Pearson's correlation coefficient. **(c)** Snapshot of the AID CLIP-seq replicates at the *IgH* and *Ebf1* loci. Of note, AID binding sites at *Ebf1* were localized in a super-enhancer region<sup>33</sup>. The signal is shown in red or blue to indicate its localization on the Watson or Crick strand, respectively.
