# Supplementary material for: The RNA-binding protein ROD1/PTBP3 cotranscriptionally defines AID-loading sites to mediate antibody class switch in mammalian genomes
Source: PubMed Central journal article supplement (PMC6170407; doi:10.1038/s41422-018-0076-9), 2018-08-24
Supplement: 41422_2018_76_MOESM13_ESM.pdf [file 41422_2018_76_MOESM13_ESM.pdf]

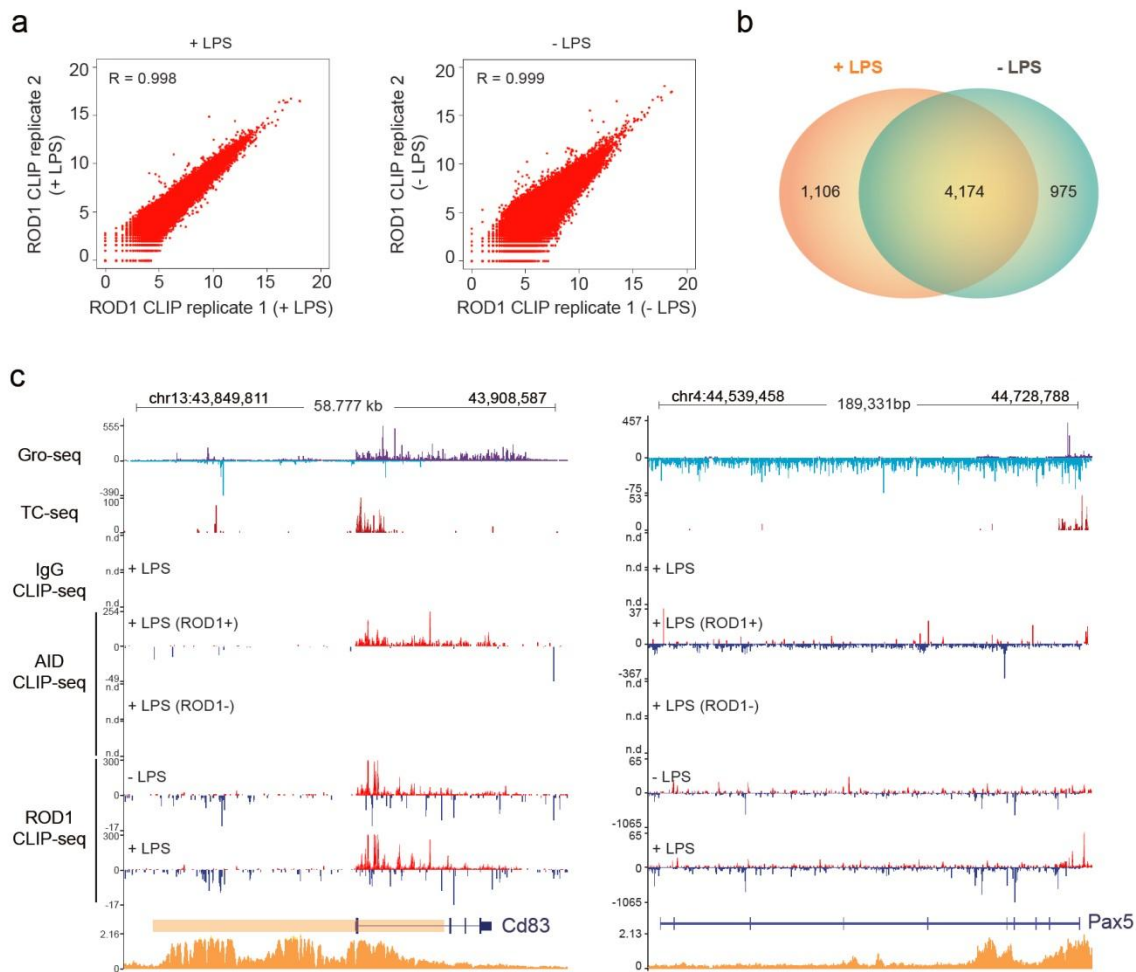

**Supplementary Figure 13.** ROD1 binding profiles are similar before and after LPS stimulation. **(a)** Pearson's correlation analysis of ROD1 CLIP-seq replicates. **(b)** Venn diagram of genes with ROD1 CLIP-seq peaks before and after LPS treatment. **(c)** Snapshot of the Gro-seq, TC-seq and CLIP-seq profiles in the vicinity of *Pax5* and *Cd83*. ROD1 and AID CLIP-seq signals are shown as red and blue for reads located on the Watson and Crick strands, respectively. Bottom: the H3K27Ac signal is shown in orange. The reported super-enhancer is marked with an orange box.
