# Supplementary material for: The RNA-binding protein ROD1/PTBP3 cotranscriptionally defines AID-loading sites to mediate antibody class switch in mammalian genomes
Source: PubMed Central journal article supplement (PMC6170407; doi:10.1038/s41422-018-0076-9), 2018-08-24
Supplement: 41422_2018_76_MOESM14_ESM.pdf [file 41422_2018_76_MOESM14_ESM.pdf]

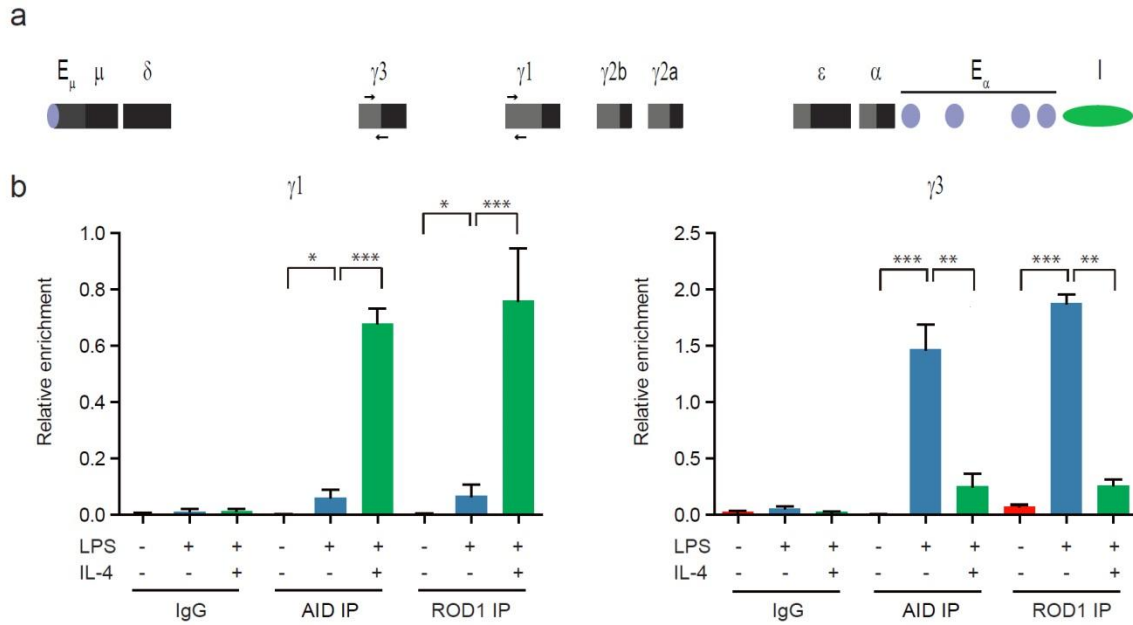

**Supplementary Figure 14.** ROD1 and AID occupy different  $\gamma$ -regions in response to different stimulations. **(a)** Diagram of the whole *IgH* locus. Primers targeting  $\gamma 1$  and  $\gamma 3$  are shown as arrowheads. **(b)** RIP-qPCR analysis of ROD1 and AID occupancy at  $\gamma 1$  and  $\gamma 3$  regions in B cells activated either by LPS or LPS plus IL-4 ( $n = 3$ ). Data are shown as the mean  $\pm$  SD ( $n = 3$ ) and normalized against input. \* $P < 0.05$ , \*\* $P < 0.01$ , \*\*\* $P < 0.001$ , two-tailed Student's *t*-test.
