# Supplementary material for: The RNA-binding protein ROD1/PTBP3 cotranscriptionally defines AID-loading sites to mediate antibody class switch in mammalian genomes
Source: PubMed Central journal article supplement (PMC6170407; doi:10.1038/s41422-018-0076-9), 2018-08-24
Supplement: 41422_2018_76_MOESM15_ESM.pdf [file 41422_2018_76_MOESM15_ESM.pdf]

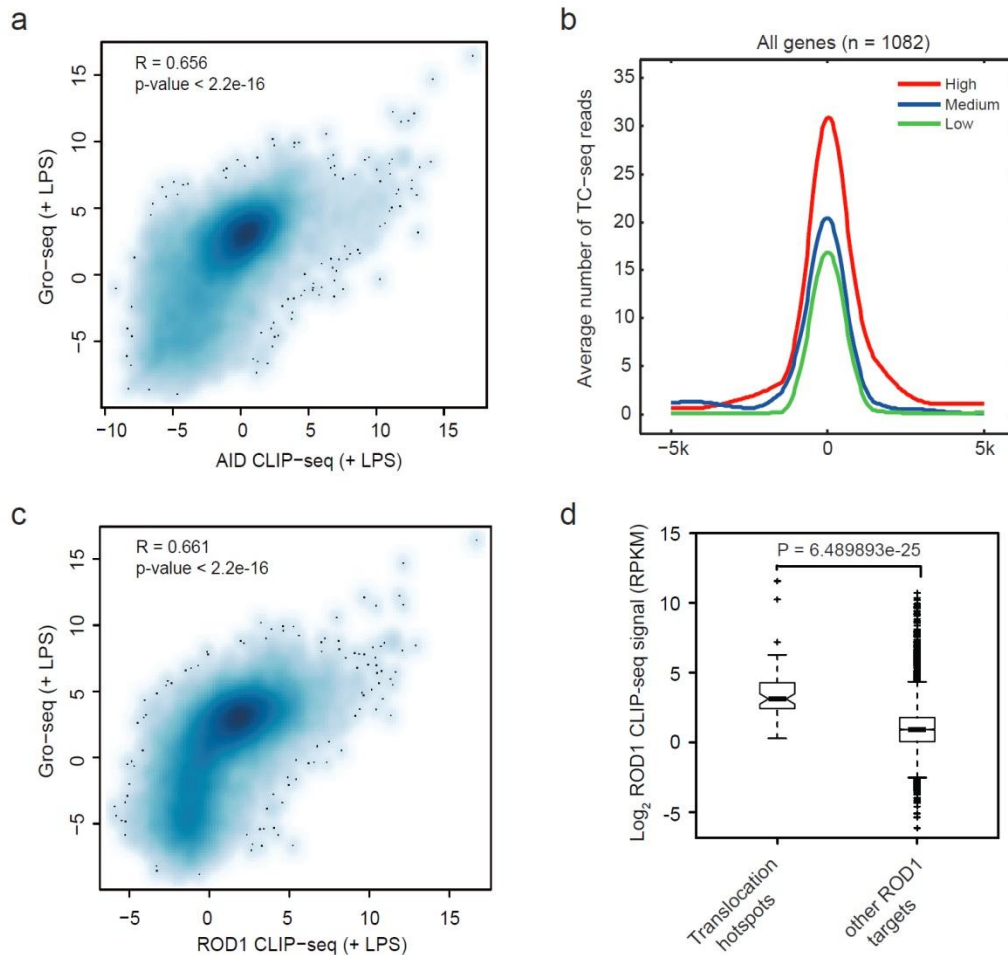

**Supplementary Figure 15.** ROD1 occupancy is highly correlated with TC-seq and Gro-seq signals. **(a)** The Pearson's correlation analysis of AID CLIP-seq to Gro-seq signals in LPS-activated B cells. Scatter plots represent the  $\text{log}_2$ -normalized RPKM values of Refseq genes between the two datasets. The  $P$  value and  $R$  are indicated. **(b)** ROD1 binding profiles around the center of the translocation hotspots detected by TC-seq. TC-seq-detected genes ( $n = 1082$ ) were subgrouped into low, medium or high based on ROD1 CLIP-seq signal. **(c)** Pearson's correlation analysis of ROD1 CLIP-seq to Gro-seq signals in LPS-activated B cells. **(d)** Enrichment of ROD1 CLIP-seq reads among translocation hotspots in LPS-activated B cells. The comparison is performed between 61 translocation hotspot genes and 5,219 other ROD1 targets.  $P$  value was determined by Wilcoxon rank-sum test.
