# Supplementary material for: The RNA-binding protein ROD1/PTBP3 cotranscriptionally defines AID-loading sites to mediate antibody class switch in mammalian genomes
Source: PubMed Central journal article supplement (PMC6170407; doi:10.1038/s41422-018-0076-9), 2018-08-24
Supplement: 41422_2018_76_MOESM16_ESM.pdf [file 41422_2018_76_MOESM16_ESM.pdf]

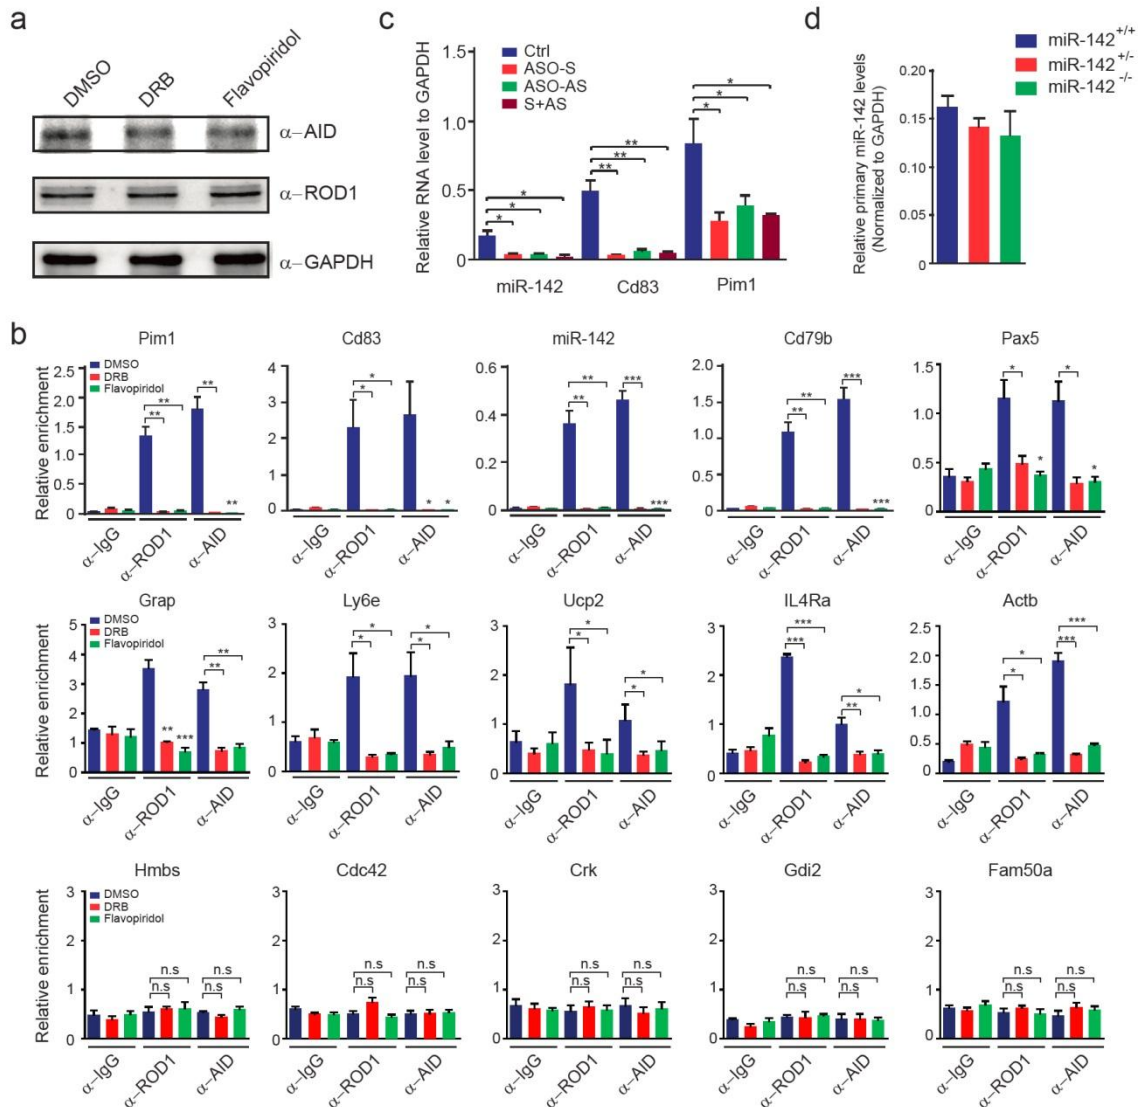

**Supplementary Figure 16.** The interaction of ROD1 with chromatin is dependent on transcription. **(a)** Western blot analysis of ROD1 and AID expression levels upon a transient block of transcription. GAPDH served as a loading control. **(b)** ChIP-qPCR for ROD1 occupancy at 10 AID targeted regions after blocking transcription. Five genes, namely, *Hmbs*, *Cdc42*, *Crk*, *Gdi2* and *Fam50a*, served as non-target controls. The relative enrichment was calculated by normalizing all of the data against input DNA. **(c)** RT-qPCR examination of bi-directional RNA upon ASO oligo treatment. The relative levels of bi-directional RNA were normalized to GAPDH. **(d)** RT-qPCR examination of primary miR-142 levels in different genotypes. Data are shown as the mean  $\pm$  SD ( $n = 3$ ) for (b), (c) and (d). \* $P < 0.05$ , \*\* $P < 0.01$ , \*\*\* $P < 0.001$  and  $P > 0.05$  was non-significant (n.s) as determined by two-tailed Student's *t*-test.
