# Supplementary material for: The RNA-binding protein ROD1/PTBP3 cotranscriptionally defines AID-loading sites to mediate antibody class switch in mammalian genomes
Source: PubMed Central journal article supplement (PMC6170407; doi:10.1038/s41422-018-0076-9), 2018-08-24
Supplement: 41422_2018_76_MOESM17_ESM.pdf [file 41422_2018_76_MOESM17_ESM.pdf]

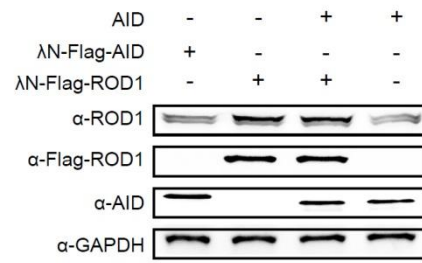

**Supplementary Figure 17.** The expression levels of AID and ROD1 in transfected HEK293 cells by Western blotting. GAPDH served as a loading control, Related to Fig. 6e.
