# Supplementary material for: The RNA-binding protein ROD1/PTBP3 cotranscriptionally defines AID-loading sites to mediate antibody class switch in mammalian genomes
Source: PubMed Central journal article supplement (PMC6170407; doi:10.1038/s41422-018-0076-9), 2018-08-24
Supplement: 41422_2018_76_MOESM18_ESM.pdf [file 41422_2018_76_MOESM18_ESM.pdf]

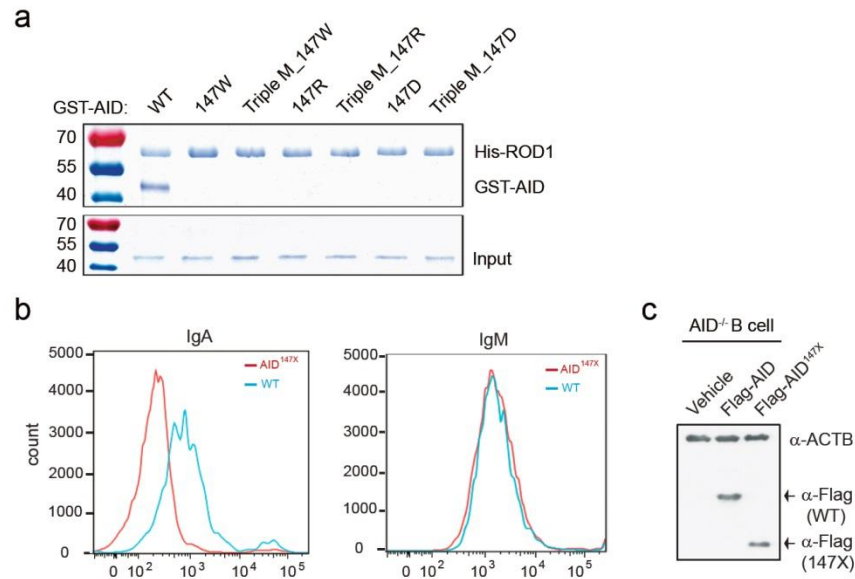

**Supplementary Figure 18.** The 147X mutation disrupts the interaction of AID with ROD1 *in vitro*. **(a)** His-ROD1 pulls down GST-AID but not its 147X mutation variant. Triple M stands for combined mutations at residues 139, 147 and 151. **(b)** CSR to IgA is compromised in AID<sup>147X</sup> knock-in CH12F3 cells after stimulation with CIT (CD40L, IL-4 and TGF- $\beta$ ). **(c)** The expression levels of Flag-tagged AID and AID<sup>147X</sup> mutant in retrovirally transduced AID<sup>-/-</sup> B cells. The two arrow heads mark the positions of WT and 147X mutant proteins, respectively.
