# Supplementary material for: The RNA-binding protein ROD1/PTBP3 cotranscriptionally defines AID-loading sites to mediate antibody class switch in mammalian genomes
Source: PubMed Central journal article supplement (PMC6170407; doi:10.1038/s41422-018-0076-9), 2018-08-24
Supplement: 41422_2018_76_MOESM19_ESM.pdf [file 41422_2018_76_MOESM19_ESM.pdf]

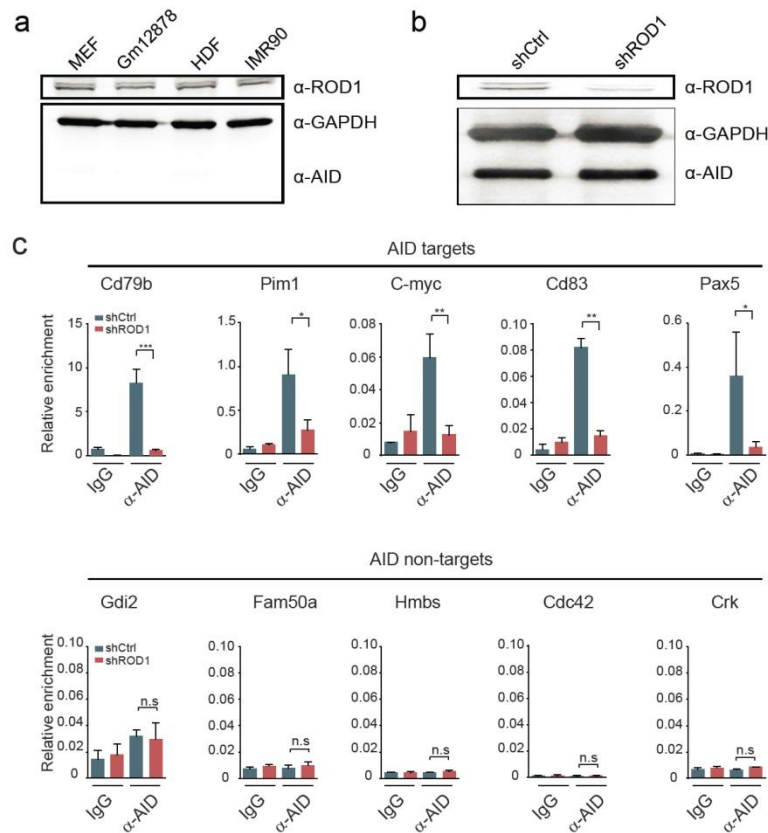

**Supplementary Figure 19.** ROD1 determines AID targeting in human Ramos B cells. **(a)** ROD1 and AID expression levels in diverse mouse and human cell lines. GAPDH served as a loading control. AID is not expressed in the examined cells. **(b)** Western blotting to examine ROD1 knockdown effects in Ramos B cells. **(c)** ChIP-qPCR for AID occupancy in five AID-targeted regions upon ROD1 depletion in Ramos cells. ChIP was performed with anti-AID or control IgG. Five genes, namely *Hmbs*, *Cdc42*, *Crk*, *Gdi2* and *Fam50a*, served as non-target controls. Data are shown as the mean  $\pm$  SD ( $n = 3$ ) and normalized against input DNA. \* $P < 0.05$ , \*\* $P < 0.01$ , \*\*\* $P < 0.001$  and  $P > 0.05$  was non-significant (n.s) as determined by two-tailed Student's *t*-test.
